# Supplementary material for: Dynamic interactions between iron and sulfur cycles from Arctic methane seeps
Source: Copernicus journal article supplement (doi:10.5194/bg-2018-223), 2018-05-28
Supplement: Supplementary file 1 [file Supp_tab.xlsx]

## Sheet: PW data
HH13-26PC
Depth	SO4	SHS	Fe(II)	Mn	TA	CA	d13C-DIC	PO4	NH4	NO4	Mg	Ca
cmbsf	mM	mM	mM	mM	mM	mM	permil	mM	mM	mM	mM	mM
0	28.3043	BD	NA	BD	NA	NA	0.61325	0.742323	BD	NA	NA	NA
1	28.3269	BD	5.17746	4.11373	NA	NA	NA	3.75417	BD	NA	51.4297	10.0055
2	27.9437	BD	42.3956	16.7644	NA	NA	-2.723	10.5627	2.51644	NA	51.0183	9.88073
3	27.7124	BD	25.5234	11.3947	NA	NA	-3.108	NA	21.3675	NA	49.784	9.53141
4	28.7674	BD	43.2227	9.3196	NA	NA	-3.5495	15.2625	24.2677	NA	50.1954	9.58132
5	NA	BD	10.1151	NA	NA	NA	-4.69775	15.0734	24.2677	NA	NA	NA
6	27.8753	BD	17.0625	9.46522	NA	NA	-3.93925	14.1278	24.2677	NA	52.6641	10.1053
7	27.6516	BD	1.67895	6.27981	NA	NA	-4.3695	13.7495	25.7177	NA	49.3726	9.40666
8	27.8697	BD	4.76806	6.04318	NA	NA	-4.3785	11.6691	25.7177	NA	49.784	9.48151
10	27.4681	0.120848	0.0537595	3.47665	NA	NA	-7.73	10.3452	25.7177	NA	50.1954	9.40666
12	17.1739	0.0765372	0.260527	NA	NA	NA	-7.582	NA	24.2677	NA	NA	NA
14	18.1279	0.20908	0.095113	NA	NA	NA	-9.99275	NA	24.2677	NA	NA	NA
16	NA	0.2037	0.095113	NA	NA	NA	-11.0522	NA	NA	NA	NA	NA
18	NA	0.263956	0.136467	NA	NA	NA	-7.67625	NA	NA	NA	NA	NA
21	26.0117	0.367252	0.136467	3.49485	NA	NA	NA	NA	24.2677	NA	48.1382	8.63317
24	17.0228	0.48346	0.0537595	NA	NA	NA	-13.0835	NA	24.2677	NA	NA	NA
28	16.3499	0.711572	0.17782	3.27642	NA	NA	-13.569	NA	24.2677	NA	51.8412	8.95753
32	14.935	0.909556	0.095113	NA	NA	NA	-16.4815	NA	27.1678	NA	NA	NA
36	17.5356	0.928889	0.095113	NA	NA	NA	-16.29	NA	31.5181	NA	NA	NA
39	NA	0.939684	0.17782	NA	NA	NA	-16.1378	NA	NA	NA	NA	NA
HH13-23PC
Depth	SO4	SHS	Fe(II)	Mn	TA	CA	d13C-DIC	PO4	NH4	NO4	Mg	Ca
cmbsf	mM	mM	mM	mM	mM	mM	permil	mM	mM	mM	mM	mM
0	28.3721	BD	NA	BD	NA	NA	-1.9485	0.64776	0	NA	51.8412	9.95559
1	NA	BD	3.94099	NA	NA	NA	NA	NA	NA	NA	NA	NA
2	27.2261	BD	8.69664	3.96811	NA	NA	-0.97475	9.58873	9.76684	NA	49.3726	9.63122
3	29.0154	BD	7.74551	3.82249	NA	NA	-1.1975	8.83223	9.76684	NA	49.784	9.68112
4	28.0624	BD	7.00115	1.94765	NA	NA	-1.68625	7.88659	17.0172	NA	48.9611	9.58132
5	27.6236	BD	9.48236	1.75106	NA	NA	-0.88125	8.6431	24.2677	NA	50.1954	9.75598
6	27.6878	BD	2.49362	1.23412	NA	NA	-1.17075	7.69747	2.51644	NA	49.784	9.73102
7	27.9334	BD	0.88083	1.14129	NA	NA	-1.34075	9.02135	17.0172	NA	48.5497	9.45656
8	NA	BD	1.99737	NA	NA	NA	-1.064	NA	17.0172	NA	NA	NA
10	NA	BD	NA	NA	NA	NA	-1.2955	NA	24.2677	NA	NA	NA
12	21.9802	BD	14.1553	2.56653	NA	NA	-1.107	NA	24.2677	NA	48.9611	9.40666
14	27.235	BD	2.90715	2.65754	NA	NA	-3.36	5.23882	21.3675	NA	48.9611	9.3318
16	29.1577	BD	10.02	NA	NA	NA	-4.64925	7.50834	22.8176	NA	NA	NA
19	26.8523	BD	13.4936	NA	NA	NA	-5.6605	8.83223	22.8176	NA	NA	NA
22	26.6763	BD	19.738	4.6416	NA	NA	-6.3645	9.58873	24.2677	NA	48.9611	9.15714
25	24.9519	BD	11.7154	5.4425	NA	NA	-6.61375	NA	27.1678	NA	49.784	9.232
28	19.9884	BD	17.8358	NA	NA	NA	-3.431	NA	31.5181	NA	NA	NA
30	25.5802	BD	12.7493	NA	NA	NA	0.1945	NA	NA	NA	NA	NA
HH13-26PC
Depth	SO4	SHS	Fe(II)	Mn	TA	CA	d13C-DIC	PO4	NH4	NO4	Mg	Ca
cmbsf	mM	mM	mM	mM	mM	mM	permil	mM	mM	mM	mM	mM
0	28.2923	NA	BD	BD	NA	NA	NA	0.66352	6.09182	NA	50.744	9.65201
1	27.2908	0	16.223	0.911937	NA	NA	NA	6.37046	0	NA	NA	NA
2	27.371	0	38.2603	NA	NA	NA	NA	9.23573	9.76684	NA	48.5497	9.38171
3	27.2964	0	38.2603	0.784521	NA	NA	-1.6575	8.56717	17.0172	NA	49.3726	9.45656
4	27.6686	0	70.3506	1.04663	NA	NA	-2.6075	13.4381	20.6425	NA	50.6069	9.75598
5	26.6898	0	86.892	1.55994	NA	NA	-3.19275	19.7417	38.7685	NA	50.1954	9.63122
6	27.481	0	83.2446	1.56722	NA	NA	-4.48675	19.8372	46.0189	NA	48.5497	9.78093
7	27.1537	0	105.989	2.22069	NA	NA	-5.441	27.2869	85.8961	NA	48.9611	9.83083
8	27.191	0	80.3498	2.3299	NA	NA	-6.56025	29.1016	137.374	NA	48.9611	9.70607
10	26.7006	0	43.1317	2.25709	NA	NA	-8.3365	28.242	172.176	NA	47.3154	9.40666
12	26.8889	0	37.7557	3.22181	NA	NA	-11.6368	43.8626	241.78	NA	48.1382	9.45656
14	25.4854	0.00347679	2.42332	2.80316	NA	NA	-12.5045	69.8888	343.286	NA	48.5497	9.48151
16	25.139	0.0414596	0.384588	2.20248	NA	NA	NA	74.4255	455.667	NA	48.9611	9.48151
18	24.1598	0.0734698	0.260527	1.80203	NA	NA	-13.0807	73.7091	528.171	NA	48.9611	9.35675
20	24.1853	0.22949	0.219174	1.00477	NA	NA	-14.0425	73.2316	701.072	NA	48.9611	9.35675
24	22.8819	0.43662	0.219174	NA	NA	NA	-14.6753	68.2174	749.607	NA	48.9611	9.15714
28	22.0586	0.54153	0.17782	NA	NA	NA	-11.9327	64.6358	909.116	NA	49.3726	9.18209
32	21.4587	0.923509	0.219174	NA	NA	NA	-15.5928	62.7256	1027.64	NA	48.1382	8.75792
35	20.7792	1.09836	0.219174	NA	NA	NA	-15.6958	61.0542	1121.89	NA	48.9611	8.83278
39	20.0031	1.36736	0.219174	NA	NA	NA	-16.1003	61.5317	1353.91	NA	47.7268	8.38365
HH13-53PC
Depth	SO4	SHS	Fe(II)	Mn	TA	CA	d13C-DIC	PO4	NH4	NO4	Mg	Ca
cmbsf	mM	mM	mM	mM	mM	mM	permil	mM	mM	mM	mM	mM
0	28.2923	0	BD	BD	NA	NA	NA	0.66352	6.09182	NA	50.744	9.65201
1	28.2265	0	16.5125	14.034	NA	NA	-1.77025	4.52713	13.392	NA	51.0183	9.63122
2	27.7659	0	23.5136	15.3082	NA	NA	-1.7435	5.48222	6.14164	NA	52.2526	9.85578
3	26.3484	0	25.0271	13.7974	NA	NA	NA	NA	NA	NA	48.9611	9.3318
4	28.2286	0	24.0347	13.4515	NA	NA	-1.424	5.48222	13.392	NA	52.2526	10.0055
5	27.6283	0	34.9272	12.4504	NA	NA	-0.99925	6.81935	17.0172	NA	51.4297	9.80588
6	27.6351	0	38.9219	12.232	NA	NA	-2.284	7.20139	17.0172	NA	50.1954	9.70607
7	27.753	0	30.6512	11.8133	NA	NA	-2.41325	7.01037	17.0172	NA	50.6069	9.68112
8	27.6232	0	27.1775	11.067	NA	NA	-2.682	6.43731	17.0172	NA	50.1954	9.65617
10	27.643	0	35.4482	10.612	NA	NA	-2.6215	7.3924	17.0172	NA	51.0183	9.78093
12	27.5836	0	32.1399	9.93848	NA	NA	-3.2805	7.3924	17.0172	NA	48.5497	9.30685
14	27.3656	0	39.0873	9.82926	NA	NA	-3.6635	7.20139	20.6425	NA	49.3726	9.43161
16	27.0615	0	42.561	9.55623	NA	NA	-3.9735	8.15648	24.2677	NA	49.3726	9.40666
18	26.9205	0	41.2377	9.68364	NA	NA	-3.641	10.8307	24.2677	NA	49.3726	9.40666
20	26.8964	0	39.0873	9.79286	NA	NA	NA	10.0667	24.2677	NA	48.5497	9.18209
CAGE15-2-904MC
Depth	SO4	SHS	Fe(II)	Mn	TA	CA	d13C-DIC	PO4	NH4	NO4	Mg	Ca
cmbsf	mM	mM	mM	mM	mM	mM	permil	mM	mM	mM	mM	mM
0	31.8367	BD	0.0837008	NA	2.41033	2.41033	NA	1.0153	3.9908	0.4433	53.7093	10.3352
1	26.8367	BD	98.5129	NA	2.29932	2.29932	-0.872944	1.4333	40.0158	1.1297	53.4789	10.5376
3	26.1224	0.153642	1.96977	NA	3.46768	3.31404	NA	4.8521	33.4862	0.6347	53.6056	10.3812
5	26.2245	0.760009	0.256915	NA	4.67961	3.9196	-10.72	8.047	48.659	0.599	53.8004	10.2443
7	25.6122	0.670748	0.162646	NA	4.56091	3.89016	NA	6.2843	39.721	0.6215	53.2519	10.0169
9	24.6939	1.21389	BD	NA	6.06001	4.84612	-12.9158	7.2226	52.7714	0.5236	53.6563	9.83951
11	24.7959	1.21766	0.122959	NA	NA	NA	NA	6.831	59.3208	1.1572	53.3526	9.73908
13	23.9796	1.48061	0.13614	NA	7.01703	5.53642	-15.1205	6.5879	52.1785	1.0593	53.3651	9.57132
15	23.2653	1.82599	0.298032	NA	8.01996	6.19397	NA	NA	NA	NA	52.6533	9.27994
17	23.7755	2.03916	0.0837008	NA	7.88773	5.84857	-17.3868	11.1892	55.1639	4.0216	53.5575	9.44562
19	23.4694	2.34979	0.0837008	NA	7.93213	5.58234	NA	7.9134	63.6801	1.4157	52.8645	9.27252
21	23.1633	2.68922	0.0707101	NA	8.72274	6.03353	-18.0305	7.04	56.0703	1.1341	52.4288	9.22129
23	22.449	3.31434	BD	NA	9.57187	6.25753	NA	9.0552	60.0765	0.9746	53.267	9.30389
25	21.0204	3.97348	BD	NA	11.7873	7.81387	-20.018	9.3313	60.6067	0.506	52.0025	8.86689
27	20.8163	4.02833	0.162646	NA	12.8158	8.78745	-22.2239	NA	NA	NA	52.3298	8.8315
29	18.9796	4.449	BD	NA	14.0976	9.64861	NA	NA	NA	NA	52.5476	8.6207
31	19.4898	4.57821	BD	NA	15.4255	10.8473	-20.9105	9.6074	68.3177	0.1595	52.1063	8.5547
33	19.2857	4.88321	0.057767	NA	14.8209	9.93772	-22.985	NA	NA	NA	52.8519	8.6071
CAGE15-2-932MC
Depth	SO4	SHS	Fe(II)	Mn	TA	CA	d13C-DIC	PO4	NH4	NO4	Mg	Ca
cmbsf	mM	mM	mM	mM	mM	mM	permil	mM	mM	mM	mM	mM
1	28.4694	BD	3.12612	NA	NA	NA	NA	0.3663	8.1215	0.2479	53.5211	10.3453
3	NA	BD	208.15	NA	2.5938	2.5938	NA	4.03485	8.25655	0.2257	54.0877	10.5161
5	27.3469	BD	139.122	NA	3.50979	3.50979	NA	4.26425	8.91885	0.3034	53.6246	10.2429
7	NA	BD	48.3086	NA	4.428	4.428	NA	0.77515	6.5564	0.07955	53.7672	10.07
9	NA	BD	10.1904	NA	5.72249	5.72249	NA	3.1672	6.82465	0.05735	54.1534	9.86758
11	23.9796	BD	0.47178	NA	7.20801	7.20801	NA	2.7861	6.697	0.037	53.7227	9.44597
CAGE15-2-938MC
Depth	SO4	SHS	Fe(II)	Mn	TA	CA	d13C-DIC	PO4	NH4	NO4	Mg	Ca
cmbsf	mM	mM	mM	mM	mM	mM	permil	mM	mM	mM	mM	mM
0	29.1837	BD	0.189293	NA	2.59715	2.59715	NA	1.0626	6.4988	0.759	54.2006	10.6813
1.5	NA	BD	34.991	NA	2.56165	2.56165	NA	3.1515	17.3943	0.3531	52.5159	10.3467
2.5	NA	BD	58.0648	NA	NA	NA	NA	3.9314	28.8904	0.7502	53.5851	10.5188
5.5	NA	BD	13.2281	NA	2.78939	2.78939	NA	3.7818	30.1543	0.7854	53.3543	10.4985
7.5	NA	BD	1.23003	NA	2.90815	2.90815	NA	5.9257	31.4974	0.7843	53.7236	10.6315
9.5	NA	BD	0.37583	NA	NA	NA	NA	9.13605	44.4148	0.7791	52.6742	10.3646
11.5	26.9388	0.0920345	0.719475	NA	2.96107	2.86904	NA	7.2358	42.3412	0.7348	52.9242	10.4272
13.5	NA	0.147454	0.804523	NA	NA	NA	NA	NA	NA	NA	52.9395	10.4002
15.5	NA	0.165962	0.439598	NA	3.06572	2.89976	NA	6.7892	60.0402	0.649	53.1484	10.4461
17.5	NA	0.245186	0.619056	NA	NA	NA	NA	4.947	45.8561	0.861914	53.6241	10.5514
19.5	27.3469	0.430261	0.328526	NA	3.34629	2.91603	NA	4.8554	47.6311	0.9614	53.546	10.4957
21.5	NA	0.723587	0.266148	NA	NA	NA	NA	5.15725	51.069	0.907725	53.9596	10.5061
23.5	26.6327	1.09847	0.174072	NA	4.29751	3.19905	NA	5.8938	63.1356	1.0329	53.1735	10.2831
25.5	NA	1.27667	0.174072	NA	NA	NA	NA	5.77588	55.996	1.05472	53.5589	10.2282
27.5	25.5102	1.33143	0.189293	NA	5.08578	3.75435	NA	6.51945	58.103	1.29605	53.1498	10.1663
29.5	NA	1.49837	0.174072	NA	NA	NA	NA	5.5968	56.0512	1.568	53.3311	10.0817
31.5	25.6122	1.65571	0.158899	NA	5.49242	3.83671	NA	6.30997	53.3573	1.24093	53.0216	9.99959
33.5	NA	1.47349	0.174072	NA	NA	NA	NA	NA	NA	NA	53.5911	10.0895
35.5	26.9388	1.60437	0.174072	NA	5.45469	3.85032	NA	NA	NA	NA	53.579	10.0923
CAGE16-5-1029PC
Depth	SO4	SHS	Fe(II)	Mn	TA	CA	d13C-DIC	PO4	NH4	NO4	Mg	Ca
cmbsf	mM	mM	mM	mM	mM	mM	permil	mM	mM	mM	mM	mM
0	27.0241	0.0217618	0.237263	BD	2.32436	2.30259	NA	0.433378	11.7786	2.51624	49.3726	9.63122
1	28.063	0.0216788	10.1072	0.928319	2.25784	2.23616	NA	NA	NA	NA	47.7268	9.45656
3	27.5858	0.0222649	1.927	BD	2.61962	2.59736	NA	1.14	17.784	1.08	48.9611	9.55637
5	27.275	0.078351	0.429659	BD	3.1001	3.02174	NA	0.646	14.21	0.96	47.7268	9.3318
7	27.3776	0.138351	0.221573	BD	4.13073	3.99238	NA	0.73	23.344	0.842	44.8467	8.78287
9	27.2596	0.597614	BD	BD	4.6452	4.04759	NA	0.566	21.554	0.722	51.8412	10.2051
11	25.3243	1.69359	BD	BD	9.11631	7.42272	NA	0.32	17.98	0.482	51.8412	10.1053
13	16.0163	4.97418	BD	BD	21.1705	16.1963	NA	1.154	17.082	0.844	49.784	9.25695
15	12.2195	3.68068	BD	BD	25.7902	22.1096	NA	1.22513	17.5453	0.89595	47.3154	8.48346
17	14.6737	2.95777	BD	BD	21.9132	18.9554	NA	0.994	7.932	0.726	49.784	9.03239
19	13.7386	3.21902	0.190351	BD	23.6925	20.4735	NA	NA	NA	NA	47.3154	8.23394
21	9.41242	3.79044	NA	BD	34.5075	30.7171	NA	NA	NA	NA	NA	NA
23	9.73907	5.25847	0.205936	BD	31.8129	26.5544	NA	2.48529	45.4759	0.802633	47.7268	7.95948
25	11.6697	3.41533	0.253006	BD	34.5075	31.0922	NA	2.418	37.336	0.97	41.9667	6.86162
27	13.0109	1.0723	0.221573	BD	27.7962	26.7239	NA	NA	NA	NA	44.8467	7.63511
CAGE16-5-1063MC
Depth	SO4	SHS	Fe(II)	Mn	TA	CA	d13C-DIC	PO4	NH4	NO4	Mg	Ca
cmbsf	mM	mM	mM	mM	mM	mM	permil	mM	mM	mM	mM	mM
0	27.8884	BD	0.231121	NA	2.57368	2.57368	NA	0.573764	10.3862	0.00182727	NA	NA
1	27.9509	0.0623946	112.706	NA	NA	NA	NA	2.322	21.426	1.168	NA	NA
3	28.1419	0.108715	77.8534	NA	NA	NA	NA	2.07	46.344	0.684	NA	NA
5	27.9998	BD	83.9289	NA	NA	NA	NA	2.482	54.356	0.318	NA	NA
7	28.1808	BD	5.32441	NA	NA	NA	NA	1.314	50.782	0.304	NA	NA
9	27.9421	BD	18.0899	NA	NA	NA	NA	3.25255	48.4282	0.4824	NA	NA
11	27.9421	0.0621312	4.79354	NA	NA	NA	NA	5.38315	45.1592	0.253991	NA	NA
25	27.2012	0.226284	0.635805	NA	NA	NA	NA	4.54443	59.0319	0.350836	NA	NA
35	26.8511	0.38197	0.258699	NA	4.78511	4.40314	NA	5.99345	74.1489	0.555491	NA	NA
CAGE16-5-1064MC
Depth	SO4	SHS	Fe(II)	Mn	TA	CA	d13C-DIC	PO4	NH4	NO4	Mg	Ca
cmbsf	mM	mM	mM	mM	mM	mM	permil	mM	mM	mM	mM	mM
0	27.9421	BD	BD	NA	2.57368	2.53493	NA	36.4169	398.371	0.818957	NA	NA
1	28.0094	BD	101.819	NA	NA	NA	NA	5.474	20.71	0.332	NA	NA
3	31.3244	BD	35.767	NA	NA	NA	NA	2.708	13.958	0.318	NA	NA
5	28.1262	BD	162.035	NA	NA	NA	NA	3.042	16.618	0.424	NA	NA
7	27.8362	BD	26.6801	NA	NA	NA	NA	0.27	9.856	0.052	NA	NA
9	28.0869	BD	101.56	NA	NA	NA	NA	1.9	14.326	0.04	NA	NA
23	27.5415	BD	19.0733	NA	NA	NA	NA	3.31102	36.0576	0.253991	NA	NA
37	31.5895	BD	6.30691	NA	3.39296	3.39296	NA	3.72572	67.4654	0.161411	NA	NA
CAGE16-5-1123BLC
Depth	SO4	SHS	Fe(II)	Mn	TA	CA	d13C-DIC	PO4	NH4	NO4	Mg	Ca
cmbsf	mM	mM	mM	mM	mM	mM	permil	mM	mM	mM	mM	mM
0	25.5326	0.0207255	0.348089	BD	2.39653	2.3758	NA	0.869782	3.10088	-0.0201	50.6069	9.80588
1	10.9746	6.3889	0.63397	BD	4.39172	-1.99718	NA	NA	NA	NA	55.5441	6.48735
2	7.68607	9.19364	1.70422	BD	5.61703	-3.57661	NA	NA	NA	NA	51.8412	5.01522
3	15.285	6.40429	0.500366	BD	15.2347	8.8304	NA	3.272	13.154	0.532	52.2526	8.15909
4	17.0998	4.88036	0.515902	BD	13.4272	8.54685	NA	1.578	10.412	0.64	53.4869	9.55637
5	14.2017	8.317	BD	BD	19.1361	10.8191	NA	1.32	9.926	0.264	52.6641	9.2819
8	11.221	10.3088	BD	BD	24.3334	14.0245	NA	NA	NA	NA	52.6641	7.70997
10	14.3026	8.50416	BD	BD	19.2068	10.7026	NA	3.604	17.128	0.13	52.2526	8.63317
12	11.4059	11.8907	BD	BD	26.3805	14.4897	NA	3.4848	8.53133	-0.002475	46.4925	7.03628
CAGE16-5-1124MC
Depth	SO4	SHS	Fe(II)	Mn	TA	CA	d13C-DIC	PO4	NH4	NO4	Mg	Ca
cmbsf	mM	mM	mM	mM	mM	mM	permil	mM	mM	mM	mM	mM
0.5	22.1003	BD	76.9494	8.5733	2.49103	2.45164	NA	1.94	16.856	0.456	48.9611	9.55637
1.5	20.5332	0.0790508	109.405	11.4311	2.42546	2.34641	NA	4.232	19.88	0.184	48.1382	9.38171
2.5	22.9962	BD	131.69	10.9942	NA	NA	NA	8.646	26.386	0.164	48.1382	9.43161
3.5	21.7107	BD	81.9237	12.5232	2.53395	2.49441	NA	4.824	28.542	0.142	49.784	9.65617
4.5	23.0657	BD	90.7712	13.5971	2.55537	2.55537	NA	7.528	28.524	0.122	50.1954	9.80588
7.5	23.2409	BD	19.252	4.678	2.66022	2.66022	NA	8.45479	32.0065	0.0913636	48.9611	9.55637
CAGE15-6-1521GC
Depth	SO4	SHS	Fe(II)	Mn	TA	CA	d13C-DIC	PO4	NH4	NO4	Mg	Ca
cmbsf	mM	mM	mM	mM	mM	mM	permil	mM	mM	mM	mM	mM
6	23.9796	0.0036086	5.40381	29.106	7.01896	7.01535	-17.5876	NA	NA	NA	51.3892	9.78949
13	22.1429	0.562194	2.60442	26.2218	8.81468	8.25248	-21.9008	NA	NA	NA	62.1577	11.4743
18.5	21.1224	1.77107	2.64027	9.634	10.6181	8.84704	-22.8952	NA	NA	NA	58.0925	10.4759
26	18.9796	2.02494	0.824924	2.38795	13.353	11.328	-21.7391	NA	NA	NA	52.1872	8.99161
31.5	17.3469	2.50935	2.05733	1.59639	15.7535	13.2441	-24.2569	NA	NA	NA	52.0834	8.59856
44	10.9184	3.10549	BD	3.80887	22.7305	19.625	-28.4412	NA	NA	NA	83.8059	11.104
50.5	NA	NA	BD	NA	20.0455	NA	NA	NA	NA	NA	NA	NA
64	NA	5.26766	BD	1.46358	33.8842	28.6166	NA	NA	NA	NA	49.4629	4.80388
70	1.68367	5.19328	BD	14.8978	30.193	24.9997	NA	NA	NA	NA	49.9464	4.44432
76.5	2.53061	3.07463	BD	1.12516	28.3367	25.2621	NA	NA	NA	NA	53.4827	4.4332
NA	not available
BD	below detection limit
TA	Total alkalinity
CA	Carbonate alkalinity

## Sheet: Sediment geochemistry
904MC			904MC			904MC			1521GC				1521GC			1521GC			938MC				938MC
Depth	CRS		Depth	XRF-S/Al		Depth	Mag Sus		Depth	CRS	AVS		depth	XRF-S/Al		Depth	Mag Sus		Depth	XRF-S/Al			Depth	Mag Sus
cmbsf	mmoleS/g dry sed		cmbsf			cmbsf	SI x 10^-5		cmbsf	mmoleS/g dry sed	mmoleS/g dry sed		cmbsf			cmbsf	SI x 10^-5		cmbsf				cmbsf	SI x 10^-5
0	175.162		3	5.93306		0	4.4		1	190.483			1	1.00521		1.5	15.2		4	0.789214	416.463		0	5.9
4	1304.77		4	6.4251		0.3	4.6		3	159.93	153.895		2	0.869893		3	14.6		5	0.832416	454.162		0.2	6.3
6	947.662		5	5.92801		0.6	5.2		5	694.747	97.9108		3	0.793904		4.5	12.5		6	1.117	732.612		0.4	6.8
8	1441.87		6	5.23216		0.9	5.5		7	1538.63	115.738		4	0.862516		6	10.1		7	1.72681	1487.63		0.6	7.2
10	1757.99		7	4.9812		1.2	5.9		9	1300.45	9.95705		5	1.02117		7.5	10.1		8	2.41145	2560.48		0.8	7.7
12	1279.19		8	6.96456		1.5	6.3		11	1121.43	69.2821		6	1.46623		9	9.8		9	2.77461	3216.49		1	8.2
14	1105.44		9	5.73272		1.8	6.7		13	1129.03	65.7631		7	1.56531		10.5	4.8		10	2.0718	2000.4		1.2	8.6
16	1091.63		10	3.69494		2.1	6.9		15	1578.83	104.535		8	1.47827		12	8.8		11	1.27961	913.788		1.4	9.2
18	1472.3		11	2.99638		2.4	7		17	1544.6	88.7394		9	1.57172		13.5	10.8		12	1.04055	652.837		1.6	9.6
20	1192.21		12	3.17472		2.7	7.2		19	1495.95	72.3639		10	1.72395		15	9.3		13	1.48044	1158.23		1.8	10.2
22	1519.46		13	2.48105		3	7.3		21	1576.83	113.645		11	1.73524		16.5	9.7		14	1.27767	911.532		2	10.7
24	1263.63		14	2.31837		3.3	7.5		23	2087.24	76.9174		12	2.10748		18	10		15	1.36029	1009.3		2.2	11.2
			15	2.16937		3.6	7.7		25	1369.06			13	1.87334		19.5	10.2		16	1.38594	1040.43		2.4	11.6
			16	2.645		3.9	7.8		27	1486.66	71.6421		14	1.56972		21	10.6		17	1.91976	1767.25		2.6	12.1
			17	3.47419		4.2	7.9		29	1001.71	24.0136		15	1.5246		22.5	9.7		20	2.04481	1958.21		2.8	12.7
			18	3.11015		4.5	8		31	679.007	55.5112		16	2.09331		24	10.6		21	1.86727	1689.35		3	13.2
			19	2.62429		4.8	8.1		32.5	1976.07	3.22361		17	1.74643		25.5	9.2		22	2.1393	2107.45		3.2	13.7
			20	2.25981		5.1	8.2		40	1487.69	14.4436		18	1.60951		27	9.7		23	2.56354	2828.22		3.4	14.1
			23	2.72829		5.4	8.2		42	1359.22	3.33961		19	1.83819		28.5	9.8		24	2.73665	3145.26		3.6	14.5
			24	2.87058		5.7	8.2		44	871.54			20	1.73385		30	10		25	3.05805	3767.64		3.8	15
			25	2.87136		6	8.4		46	1119.79			21	1.72087		31.5	9.4		26	2.84703	3354.11		4	15.4
			26	2.0806		6.3	8.5		48	1161.38	27.2198		22	2.12538		33	10		27	2.49162	2700.33		4.2	15.7
			27	1.761		6.6	8.5		50	1870.58	51.3493		23	2.58982		39	6.7		28	2.59006	2875.93		4.4	16
			28	1.71089		6.9	8.6		52	1518.59	13.2918		24	2.2583		40.5	7.5		29	2.95249	3558.47		4.6	16.3
			29	1.63135		7.2	8.8		54	1512.54			25	1.92752		42	8.8		30	2.9183	3491.71		4.8	16.5
			30	1.92296		7.5	8.9		56	2169.82	30.1783		26	1.76201		43.5	8.9		31	2.51939	2749.43		5	16.8
			31	1.74684		7.8	8.9		59	1653.3			27	1.84184		45	7.6		32	1.8678	1690.13		5.2	17
			32	1.71113		8.1	9.2		61	1041.57	35.208		28	1.81341		46.5	7.3		33	1.88605	1717.07		5.4	17.1
			33	1.82295		8.4	9.2		63	1711.46	13.5561		29	1.82226		48	7.8		34	2.16582	2150.11		5.6	17.3
			34	1.51576		8.7	9.3		65	1981.33			30	1.71631		49.5	9		35	1.75066	1521.18		5.8	17.3
			35	1.54278		9	9.5		67	1404.34	3.45897		31	2.69852		51	7.7		36	2.15762	2136.88		6	17.4
			36	1.42512		9.3	9.7		69	986.941			32	2.45297		52.5	8.8		37	2.39193	2526.86		6.2	17.4
			37	2.18684		9.6	9.9		71	1719.56	53.4392		33	1.98622		54	10.5		38	2.2575	2300.04		6.4	17.4
			38	2.1438		9.9	10.1		73	1264.86	19.815		34	1.94701		55.5	8.8		39	2.52603	2761.23		6.6	17.4
			39	2.27364		10.2	10.2		75	1351.22			39	1.75984		57	9.9		40	2.80196	3268.21		6.8	17.4
			40	2.05577		10.5	10.4		77	938.291	6.82394		40	2.02031		58.5	8.6						7	17.2
						10.8	10.6						41	1.66844		60	9.5						7.2	17.2
						11.1	10.8						42	1.70264		61.5	10.3						7.4	16.9
						11.4	11.1						43	1.62885		63	11.1						7.6	16.8
						11.7	11.2						44	1.54185		64.5	9.9						7.8	16.6
						12	11.5						45	1.42719		66	10.4						8	16.3
						12.3	11.8						46	1.26045		67.5	11						8.2	16
						12.6	11.9						47	1.24998		69	11.3						8.4	15.8
						12.9	12.2						48	1.48571		70.5	9.4						8.6	15.5
						13.2	12.4						49	1.41604		72	9.7						8.8	15.3
						13.5	12.7						50	1.41982		73.5	10.8						9	15
						13.8	13.1						51	1.37803		75	8.5						9.2	14.8
						14.1	13.4						52	1.46785		76.5	7						9.4	14.5
						14.4	13.8						53	1.44137									9.6	14.3
						14.7	14.1						54	1.08443									9.8	14.1
						15	14.6						55	1.09614									10	13.8
						15.3	15.1						56	1.16624									10.2	13.7
						15.6	15.6						57	1.32733									10.4	13.5
						15.9	18						58	2.01412									10.6	13.3
						16.2	16.4						59	1.34605									10.8	13.1
						16.5	16.5						60	1.68481									11	12.9
						16.8	16.5						61	1.35426									11.2	12.8
						17.1	16.3						62	1.45363									11.4	12.7
						17.4	15.8						63	1.53393									11.6	12.5
						17.7	15.3						64	1.25336									11.8	12.5
						18	14.6						65	1.59962									12	12
						18.3	14						66	1.3638									12.2	12.3
						18.6	13.4						67	1.34908									12.4	12.2
						18.9	12.8						68	1.35977									12.6	12
						19.2	12.4						69	1.2098									12.8	11.9
						19.5	11.9						70	1.60304									13	11.9
						19.8	11.6						71	1.39403									13.2	11.8
						20.1	11.3						72	1.30945									13.4	11.7
						20.4	11																13.6	11.7
						20.7	10.8																13.8	11.6
						21	10.5																14	11.5
						21.3	10.4																14.2	11.5
						21.6	10.3																14.4	11.5
						21.9	10.2																14.6	11.4
						22.2	10.2																14.8	11.4
						22.5	10																15	11.3
						22.8	10.1																15.2	11.3
						23.1	10																15.4	11.3
						23.4	10																15.6	11.3
						23.7	10.1																15.8	11.2
						24	10																16	11.1
						24.3	10.1																16.2	11.1
						24.6	10.1																16.4	11.1
						24.9	10.1																16.6	11.1
						25.2	10.1																16.8	11
						25.5	10.2																17	11
						25.8	10.2																17.2	11
						26.1	10.3																17.4	10.9
						26.4	10.3																17.6	10.9
						26.7	10.3																17.8	10.9
						27	10.3																18	10.9
						27.3	10.4																18.2	10.8
						27.6	10.4																18.4	10.8
						27.9	10.4																18.6	10.8
						28.2	10.4																18.8	10.8
						28.5	10.5																19	10.8
						28.8	10.5																19.2	10.8
						29.1	10.5																19.4	10.8
						29.4	10.6																19.6	10.7
						29.7	10.6																19.8	10.8
						30	10.6																20	10.7
						30.3	10.7																20.2	10.7
						30.6	10.7																20.4	10.7
						30.9	10.7																20.6	10.8
						31.2	10.7																20.8	10.7
						31.5	10.7																21	10.8
						31.8	10.8																21.2	10.8
						32.1	10.8																21.4	10.8
						32.4	10.8																21.6	10.8
						32.7	10.8																21.8	10.8
						33	10.8																22	10.9
						33.3	10.8																22.2	10.9
						33.6	10.8																22.4	10.9
						33.9	10.8																22.6	11
						34.2	10.7																22.8	11
						34.5	10.6																23	11
						34.8	10.5																23.2	11
						35.1	10.4																23.4	11
						35.4	10.3																23.6	11.1
						35.7	10.1																23.8	11
						36	9.9																24	11.1
						36.3	9.7																24.2	11.1
						36.6	9.5																24.4	11.1
						36.9	9.2																24.6	11.1
						37.2	8.9																24.8	11.1
						37.5	8.5																25	11.1
						37.8	8.2																25.2	11.1
						38.1	7.6																25.4	11.1
						38.4	7.1																25.6	11.2
						38.7	6.4																25.8	11.1
						39	5.7																26	11.1
						39.3	4.8																26.2	11.1
						39.6	4.1																26.4	11.1
																							26.6	11.1
																							26.8	11.1
																							27	11.1
																							27.2	11
																							27.4	11
																							27.6	11
																							27.8	11
																							28	10.9
																							28.2	10.9
																							28.4	10.9
																							28.6	10.9
																							28.8	10.8
																							29	10.8
																							29.2	10.8
																							29.4	10.8
																							29.6	10.8
																							29.8	10.7
																							30	10.7
																							30.2	10.7
																							30.4	10.7
																							30.6	10.7
																							30.8	10.7
																							31	10.7
																							31.2	10.7
																							31.4	10.7
																							31.6	10.7
																							31.8	10.7
																							32	10.7
																							32.2	10.7
																							32.4	10.7
																							32.6	10.7
																							32.8	10.7
																							33	10.6
																							33.2	10.6
																							33.4	10.6
																							33.6	10.6
																							33.8	10.6
																							34	10.6
																							34.2	10.6
																							34.4	10.5
																							34.6	10.6
																							34.8	10.5
																							35	10.4
																							35.2	10.4
																							35.4	10.4
																							35.6	10.3
																							35.8	10.3
																							36	10.2
																							36.2	10.1
																							36.4	10
																							36.6	9.8
																							36.8	9.7
																							37	9.6
																							37.2	9.3
																							37.4	9.2
																							37.6	9
																							37.8	8.8
																							38	8.5
																							38.2	8.3
																							38.4	8
																							38.6	7.6
																							38.8	7.2
																							39	7
																							39.2	6.7
																							39.4	6.3
																							39.6	5.9
																							39.8	5.6
																							40	5.2
																							40.2	4.9
																							40.4	4.6
																							40.6	4.2
																							40.8	3.8
																							41	3.4
																							41.2	3.1
																							41.4	2.8
																							41.6	2.4
																							41.8	2.2
																							42	1.9
																							42.2	1.5
